# Supplementary material
Source: HighWire-hosted journal article supplement (https://gut.bmj.com/content/72/7/1255)

**SUPPLEMENTARY FILE to manuscript:****Standardization of EUS-guided FNB technique for molecular profiling in pancreatic cancer: Results of a randomized trial**

Ji Young Bang MD MPH, Nirag Jhala, MD, Anjali Seth, MD, Konrad Krall CT (ASCP),  
Udayakumar Navaneethan MD, Robert Hawes MD, C. Mel Wilcox MD,  
Shyam Varadarajulu MD

**IRB/Registration**

The study was approved by the institutional review board of the hospital (IRB No. 1741103) and registered at ClinicalTrials.gov (NCT05043532).

**Specimen processing**

After specimen procurement and formation of formalin-fixed paraffin-embedded cell blocks, the purified DNA and RNA were eluted separately to quantify nucleic acid. NGS was performed (Archer Panels) for analyzing 69 gene DNA mutations (single nucleotide variants, insertions, and deletions) and 53 RNA somatic oncogenic gene fusions.

**Randomization and Masking**

Computer-generated randomization assignments were provided by the statistician using a block randomization method (block randomization of 4) and placed in sequentially numbered, sealed, opaque envelopes. Patients with pancreatic mass proven to have adenocarcinoma by rapid onsite evaluation at EUS were randomized equally (1:1 allocation) to two or three dedicated passes for comprehensive molecular profiling.

**Sample size calculation and Statistical analysis**

A two-sided sample size calculation was performed based on the proportion of specimens with adequate tissue to enable molecular profiling. Assuming presence of adequate tissue to allow molecular profiling in 50% of patients in the two-pass group and in 90% in the three-pass group<sup>1-3</sup>, the sample size was estimated at 16 per group (total sample size of 33 to account for a 5% drop out rate), at 80% power and two-sided alpha of 0.05.

Continuous data were summarized as means with standard deviation or medians with interquartile range and range, and were compared using the Student's t-test or Wilcoxon rank-sum test as indicated.

Categorical data were summarized as frequencies with percentages and were compared using the chi-square or the Fisher's exact test as indicated.

### **Additional Comments**

Germline testing is important in pancreatic cancer because it is associated with hereditary syndromes involving multiple generations. For such families, screening is recommended. However, screening does not detect all persons at risk. The Memorial Sloan Kettering IMPACT study that conducted germline testing of more than 1,000 patients with cancer revealed a high incidence (17%) of mutations in the pancreatic cancer subset, of whom 42% had no family history of cancer and would not have met current screening recommendations.<sup>4</sup> Although the main driver mutation is KRAS, there are numerous other potentially actionable mutations that can be identified using molecular profiling.<sup>5</sup> Also, from a diagnostic standpoint, there is growing evidence that when cytology and histology are inconclusive, molecular testing can aid diagnosis.<sup>3</sup>

In a recently published study in which 25G needles were used and 2 passes were performed for tissue procurement, only 84% of FFPE specimen yielded adequate DNA.<sup>6</sup> In two previous randomized trials, we have shown that fanning the needle and performing stylet-retraction when using the Franseen needle yielded best cellularity.

### **References**

1. Dreyer SB, Jamieson NB, Evers L, et al. Feasibility and clinical utility of endoscopic ultrasound guided biopsy of pancreatic cancer for next-generation molecular profiling. *Chin Clin Oncol* 2019; 8:16.
2. Bispo M, Marques S, Rio-Tinto R, et al. The role of endoscopic ultrasound in pancreatic cancer staging in the era of neoadjuvant therapy and personalised medicine. *GE port J Gastroenterol* 2021; 28:111-120.

3. Carrara S, Solda G, Di Leo M, et al. Side-by-side comparison of next-generation sequencing cytology, and histology in diagnosing locally advanced pancreatic adenocarcinoma. *Gastrointest Endosc* 2021; 93:597-604.
4. Cheng DT, Mitchell TN, Zehir A, et al. Memorial Sloan Kettering-integrated mutation profiling of actionable cancer targets (msk-impact): a hybridization capture-based next-generation sequencing clinical assay for solid tumor molecular oncology. *J Mol Diagn* 2015; 17:251-64.
5. Witkiewicz, AK, McMillan EA, Balaji U, et al. Whole-exome sequencing of pancreatic cancer defines genetic diversity and therapeutic targets. *Nat Commun* 2015; 6:6744.
6. Redegalli M, Grassini G, Magliacane G, et al. Routine molecular profiling in both resectable and unresectable pancreatic adenocarcinoma: relevance of cytological samples. *Clin Gastroenterol Hepatol* 2022; Oct 22.

**Supplemental Table 1.** Details of the mutations identified in 33 pancreatic ductal adenocarcinoma patients from comprehensive molecular profiling

| Randomization-FNB passes | RNA Concentration | DNA Concentration | Variants Detected 1 | Mutations 1   | Variants Detected 2 | Mutations 2 | Variants Detected 3 | Mutations 3 | Notes               |
|--------------------------|-------------------|-------------------|---------------------|---------------|---------------------|-------------|---------------------|-------------|---------------------|
| three                    | 25.7              | 7.56              | KRAS                | p.Gly12Val    | RB1                 | p.Arg320Ter | TP53                | p.Thr155Pro | TERT G373A          |
| two                      | 3.57              | 0.874             | KRAS                | p.Gly12Asp    |                     |             |                     |             |                     |
| two                      | 3.98              | 2.79              | KRAS                | p.Gly12Asp    | KRAS                | p.Gln61His  |                     |             |                     |
| three                    | 10.2              | 2.47              | KRAS                | p.Gln61Leu    |                     |             |                     |             |                     |
| three                    | 35.2              | 8.07              | KRAS                | p.Gly12Val    |                     |             |                     |             |                     |
| two                      | 10.4              | 2.76              | KRAS                | p.Gly12Asp    |                     |             |                     |             | TERT G373A          |
| three                    | 13.7              | 16                | KRAS                | p.Gly12Asp    | PIK3CA              | p.Glu545Ala | TP53                | p.Arg175His |                     |
| two                      | TOO LOW           | 8.35              | none detected       | TERT G49C     |                     |             |                     |             |                     |
| two                      | 72                | 20                | KRAS                | p.Gly12Asp    | TP53                | p.Arg175His |                     |             | TERT G349C          |
| three                    | 24                | 6.99              | KRAS                | p.Gly12Asp    |                     |             |                     |             |                     |
| three                    | 9.9               | 8.94              | KRAS                | p.Gly12Asp    | TP53                | p.Tyr163Cys |                     |             |                     |
| two                      | 47.3              | 13                | KRAS                | p.Gly12Asp    | TP53                | p.Arg196Ter |                     |             |                     |
| three                    | 38.3              | 13.8              | KRAS                | p.Gly12Arg    |                     |             |                     |             |                     |
| two                      | 40.1              | 7.21              | KRAS                | p.Gly12Asp    | GNAS                | p.Arg201His |                     |             |                     |
| two                      | 32.8              | 11.9              | KRAS                | p.Gly12Val    |                     |             |                     |             |                     |
| three                    | 46.8              | 6.23              | KRAS                | p.Gly12Val    | TP53                | p.Tyr205His |                     |             |                     |
| two                      | 5.8               | 2.6               | KRAS                | p.Gly12Val    | TP53                | p.Cys242Phe |                     |             |                     |
| two                      | 12.3              | 2.4               | KRAS                | p.Gly12Cys    |                     |             |                     |             |                     |
| three                    | 49                | 14                | KRAS                | p.Gly12Asp    | TP53                | p.Arg175His |                     |             |                     |
| three                    | 39.8              | 2.56              | KRAS                | p.Gly12Asp    | TP53                | p.Arg273Cys |                     |             |                     |
| three                    | 40.1              | 9.69              | KRAS                | p.Gly12Val    | TP53                | p.Arg175His |                     |             |                     |
| two                      | 53                | 20.3              | KRAS                | p.Gly12Val    |                     |             |                     |             |                     |
| three                    | 36.5              | 11.9              | KRAS                | p.Gly12Val    | TP53                | p.Arg282Trp |                     |             |                     |
| two                      | 32.5              | 8.29              | KRAS                | p.Gly12Val    | TP53                | p.Cys176Ser |                     |             |                     |
| two                      | 52                | 20.9              | TERT                | T349C         |                     |             |                     |             |                     |
| three                    | TOO LOW           | 0.68              | KRAS                | p.Gly12Val    | SMAD4               | p.Arg445Ter |                     |             |                     |
| two                      | 57                | 16.6              | KRAS                | p.Gly12Asp    | TERT                | T349C       |                     |             |                     |
| two                      | 27.2              | 9.64              | KRAS                | p.Gln61His    | TP53                | p.Tyr163Asn |                     |             |                     |
| three                    | 15.2              | 4.2               | KRAS                | p.Gly12Val    |                     |             |                     |             |                     |
| three                    | 17.9              | 8.07              | KRAS                | p.Gly12Arg    | TP53                | p.Cys176Arg |                     |             |                     |
| three                    | 30.5              | 5.69              | none detected       | NONE DETECTED |                     |             |                     |             | RNA FUSION POSITIVE |
| two                      | 47.2              | 14.3              | TP53                | p.Pro278Arg   | TERT                | T349C       | BRCA1               | p.Gln356Ter |                     |
| two                      | 97                | 20.5              | KRAS                | p.Gly12Val    |                     |             |                     |             |                     |

**Supplemental Figure 1.** CONSORT flow diagram of patient enrollment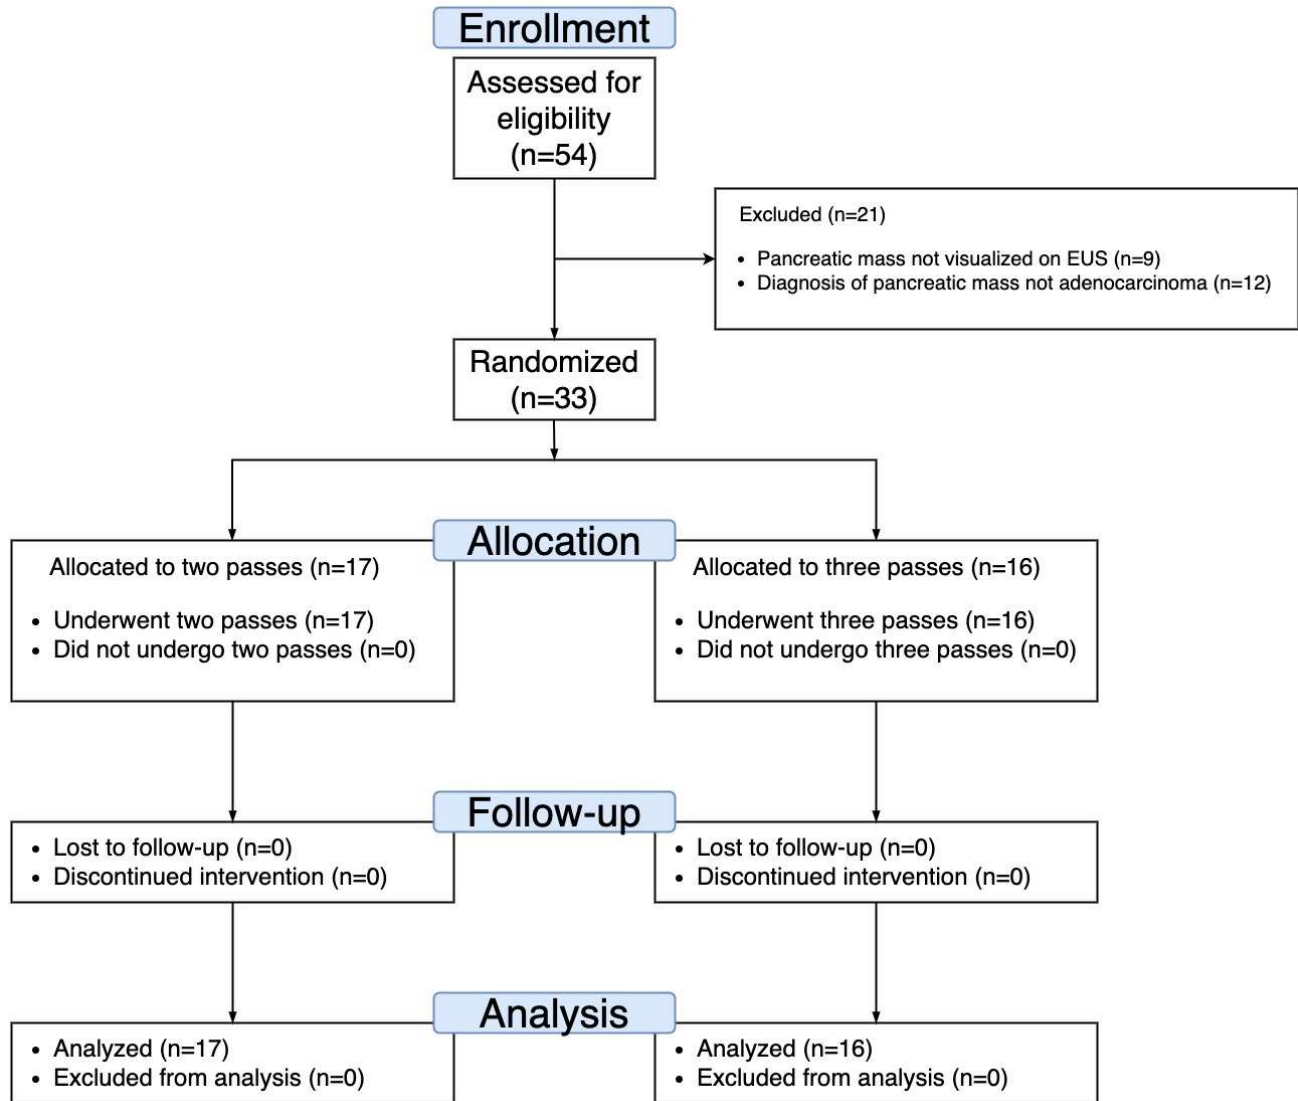

Supplement: inline-supplementary-material-1 [file inline-supplementary-material-1.pdf]
